# Supplementary material for: Tartrate-resistant acid phosphatase (TRAP) co-localizes with receptor activator of NF-KB ligand (RANKL) and osteoprotegerin (OPG) in lysosomal-associated membrane protein 1 (LAMP1)-positive vesicles in rat osteoblasts and osteocytes
Source: PubMed Central journal article supplement (PMC4298672; doi:10.1007/s00418-014-1272-4), 2014-09-09

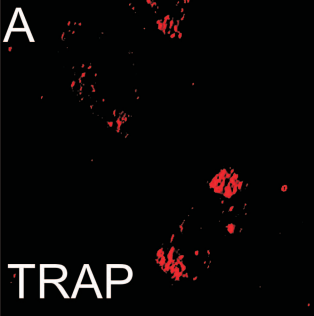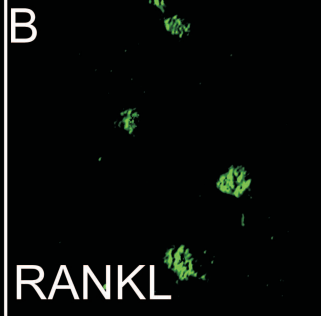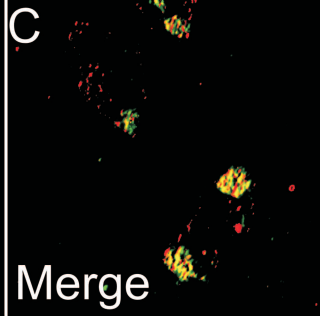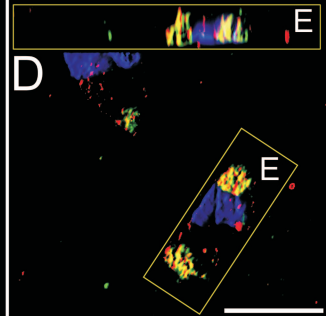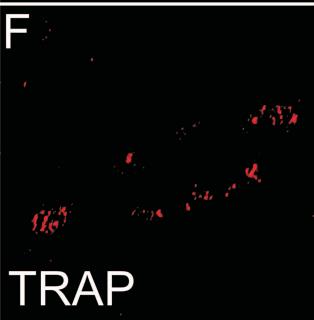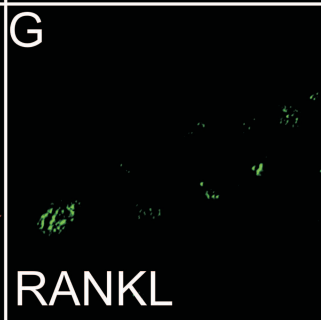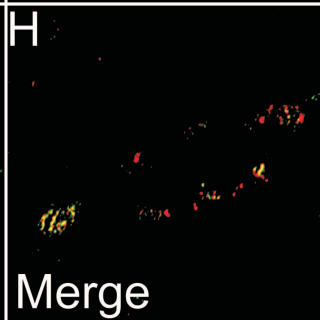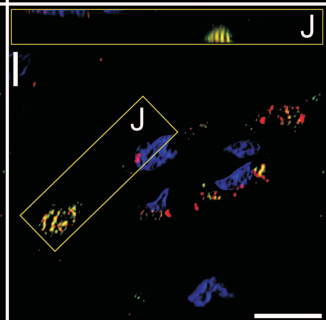

Supplement: 418_2014_1272_MOESM3_ESM.pdf [file 418_2014_1272_MOESM3_ESM.pdf]
